# Supplementary material for: A systematic analysis of the human immune response to Plasmodium vivax
Source: PubMed Central journal article supplement (PMC10575735; doi:10.1172/jci152463), 2023-10-16
Supplement: jci-133-152463-s094.pdf [file jci-133-152463-s094.pdf]

| isotype range | marker             | location      | antibody clone | source                     |
|---------------|--------------------|---------------|----------------|----------------------------|
| 89Y           | CD45               | cell surface  | HI30           | Fluidigm<br>(3089003B)     |
| 111-116 Cd    | CD14               | cell surface  | TuK4           | Thermo<br>(Q10056)         |
| 115 In        | CD57               | cell surface  | HCD57          | Biolegend<br>(322325)      |
| 141 Pr        | HLA-DR             | cell surface  | L243           | Biolegend<br>(307602)      |
| 142 Nd        | Bcl2               | nuclear       | 100            | Biolegend<br>(658702)      |
| 143 Nd        | CD45RA             | cell surface  | HI100          | Biolegend<br>(304102)      |
| 144 Nd        | granzyme B         | intracellular | GB11           | Abcam<br>(ab103159)        |
| 145 Nd        | CD4                | cell surface  | RPA-T4         | Biolegend<br>(300502)      |
| 146 Nd        | V $\delta$ 2       | cell surface  | 123R3          | Miltenyi<br>(130-095-795)  |
| 147 Sm        | CD20               | cell surface  | 2H7            | Biolegend<br>(302302)      |
| 148 Nd        | ICOS               | cell surface  | DX29           | BD biosciences<br>(557801) |
| 149 Sm        | CXCR5              | cell surface  | RF8B2          | BD biosciences<br>(552032) |
| 150 Nd        | CD95               | cell surface  | DX2            | Biolegend<br>(305602)      |
| 151 Eu        | CD103              | cell surface  | Ber-ACT8       | Fluidigm<br>(3151011B)     |
| 152 Sm        | TCR $\gamma\delta$ | cell surface  | 11F2           | Fluidigm<br>(3152008B)     |
| 153 Eu        | V $\alpha$ 7.2     | cell surface  | 3C10           | Fluidigm<br>(3153024B)     |
| 154 Sm        | Tim-3              | cell surface  | F38-2E2        | Fluidigm<br>(3154010B)     |
| 155 Gd        | PD1                | cell surface  | EH12.2H7       | Fluidigm<br>(3155009B)     |
| 156 Gd        | CD161              | cell surface  | HP-3G10        | Biolegend<br>(339902)      |
| 158 Gd        | CD27               | cell surface  | L128           | Fluidigm<br>(3158010B)     |
| 159 Tb        | Foxp3              | nuclear       | 259D/C7        | Fluidigm<br>(3159028A)     |

|            |                     |               |          |                             |
|------------|---------------------|---------------|----------|-----------------------------|
| 160 Gd     | CTLA4               | intracellular | 14D3     | eBioscience<br>(14-1529-82) |
| 161 Dy     | T-bet               | nuclear       | 4B10     | Fluidigm<br>(3161014B)      |
| 162 Dy     | integrin $\beta$ 7  | cell surface  | FIB504   | Fluidigm<br>(3162026B)      |
| 163 Dy     | CD28                | cell surface  | L293     | BD biosciences<br>(348040)  |
| 164 Dy     | Ki67                | nuclear       | Ki-67    | Biolegend<br>(350502)       |
| 165 Ho     | CD45RO              | cell surface  | UCHL1    | Biolegend<br>(304202)       |
| 166 Er     | CD56                | cell surface  | HCD56    | Biolegend<br>(318302)       |
| 167 Er     | CCR7                | cell surface  | 150503   | R&D systems<br>(MAB197-100) |
| 168 Er     | CD127               | cell surface  | A019D5   | Biolegend<br>(351302)       |
| 169 Tm     | CD38                | cell surface  | HIT2     | Biolegend<br>(303502)       |
| 170 Er     | CD3                 | cell surface  | UCHT1    | Biolegend<br>(300402)       |
| 171 Yb     | CD49d               | cell surface  | 9F10     | Biolegend<br>(304302)       |
| 172 Yb     | CD25                | cell surface  | BC96     | Biolegend<br>(302602)       |
| 173 Yb     | CD39                | cell surface  | A1       | Biolegend<br>(328202)       |
| 174 Yb     | CLA                 | cell surface  | HECA-452 | Biolegend<br>(321302)       |
| 175 Lu     | perforin            | intracellular | B-D48    | Fluidigm<br>(3175004B)      |
| 176 Yb     | CX3CR1              | cell surface  | 2A9-1    | Biolegend<br>(341602)       |
| 191/193 Ir | DNA<br>intercalator | na            | na       | Fluidigm<br>(201192A)       |
| 198 Pt     | CD8 $\alpha$        | cell surface  | RPA-T8   | Biolegend<br>(301002)       |
| 209Bi      | CD16                | cell surface  | 3G8      | Fluidigm<br>(3209002B)      |

**Supplemental Table 2.** Antibody panel for T cell function and fate in vivax malaria; includes information on the antibody clone and heavy metal conjugate.
